# Supplementary material for: High conductivity and chemical stability of BaCe1−x−yZrxYyO3−δ proton conductors prepared by a sol–gel method
Source: Royal Society of Chemistry journal article supplement (doi:10.1039/b808344d), 2008-01-01
Supplement: b808344d.pdf [file b808344d.pdf]

**High conductivity and chemical stability of  $\text{BaCe}_{1-x-y}\text{Zr}_x\text{Y}_y\text{O}_{3-\delta}$   
proton conductors prepared by sol-gel method**

*Simona Barison\*, Marino Battagliarin, Tommaso Cavallin,*

*Lioudmila Doubova, Monica Fabrizio, Cecilia Mortalò*

CNR – IENI, Corso Stati Uniti 4, 35127 PADOVA, Italy

*Stefano Boldrini*

CNR – ISIB, Corso Stati Uniti 4, 35127 PADOVA, Italy

*Lorenzo Malavasi*

University of Pavia, INSTM and CNR - IENI Pavia, Viale Taramelli 16, 27100 Pavia, Italy

*Rosalba Gerbasi*

CNR – ICIS, Corso Stati Uniti 4, 35127 PADOVA, Italy

Table S1. Summary of the microprobe analyses: the mean atomic % with standard deviations are reported.<sup>(\*)</sup>

| <b>Sample</b>   | <b>T sint.<br/>(°C)</b> | <b>Ce<br/>at%</b> | <b>Zr<br/>at%</b> | <b>Y<br/>at%</b> | <b>Ba/(Zr+Y+Ce)<br/>at%</b> |
|-----------------|-------------------------|-------------------|-------------------|------------------|-----------------------------|
| <b>BCZ20Y15</b> | 1400                    | 0.656 ± 0.006     | 0.197 ± 0.004     | 0.147 ± 0.004    | 1.034 ± 0.017               |
| <b>BCZ20Y20</b> | 1400                    | 0.601 ± 0.003     | 0.200 ± 0.004     | 0.199 ± 0.004    | 1.017 ± 0.007               |
| <b>BCZ30Y15</b> | 1450                    | 0.553 ± 0.005     | 0.298 ± 0.004     | 0.148 ± 0.004    | 1.021 ± 0.015               |
| <b>BCZ30Y20</b> | 1450                    | 0.496 ± 0.010     | 0.300 ± 0.008     | 0.204 ± 0.014    | 0.971 ± 0.029               |
| <b>BCZ40Y15</b> | 1450                    | 0.450 ± 0.006     | 0.399 ± 0.009     | 0.151 ± 0.005    | 1.030 ± 0.015               |

<sup>(\*)</sup> The data for BCZ10Y were not included because the procedure of the sample preparation induced the degradation of the pellets due to water, leading to data with high divergence.

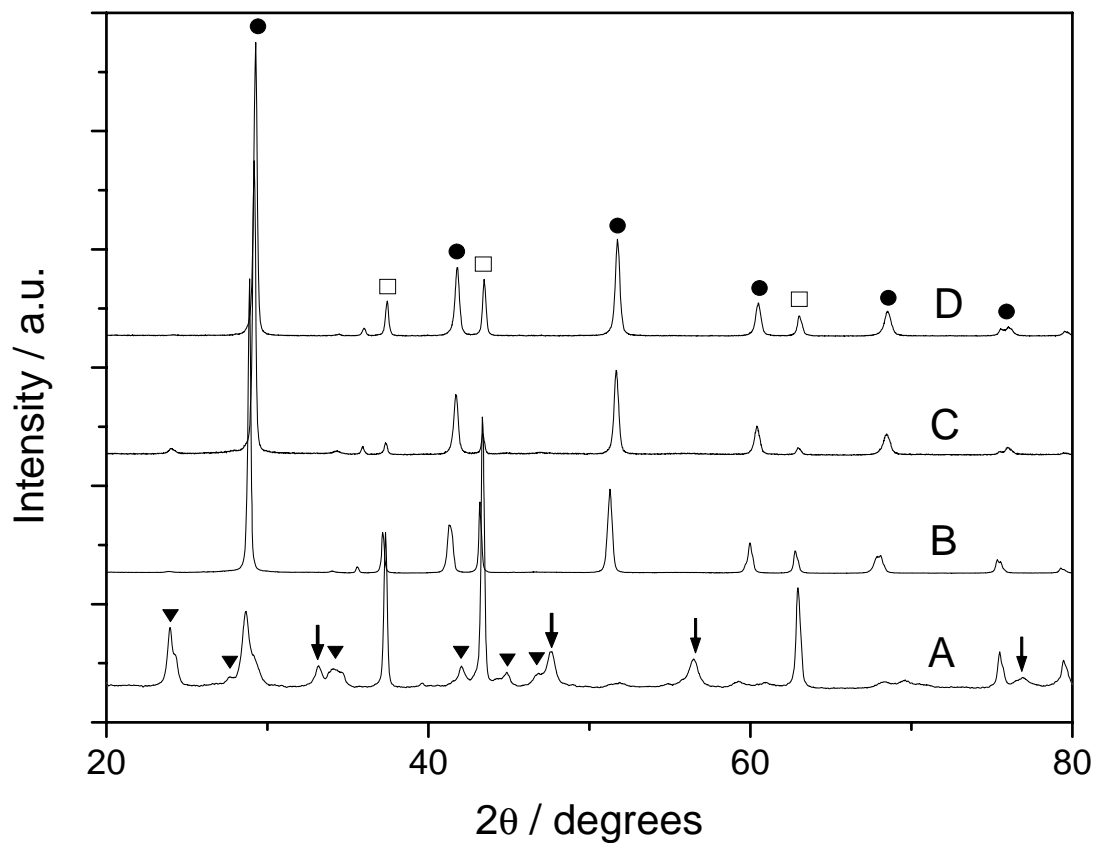

Figure S1. XRD patterns for BCZY15 (A:  $Zr=0.1$ , B:  $Zr=0.2$ ; C:  $Zr=0.3$ ) after the test in boiling water compared to BCZ30Y15 before the test (D). NiO was introduced as internal reference. The reference peak positions are reported for orthorhombic BCY (●), NiO (□),  $CeO_2$  (arrow) and  $BaCO_3$  (▼).

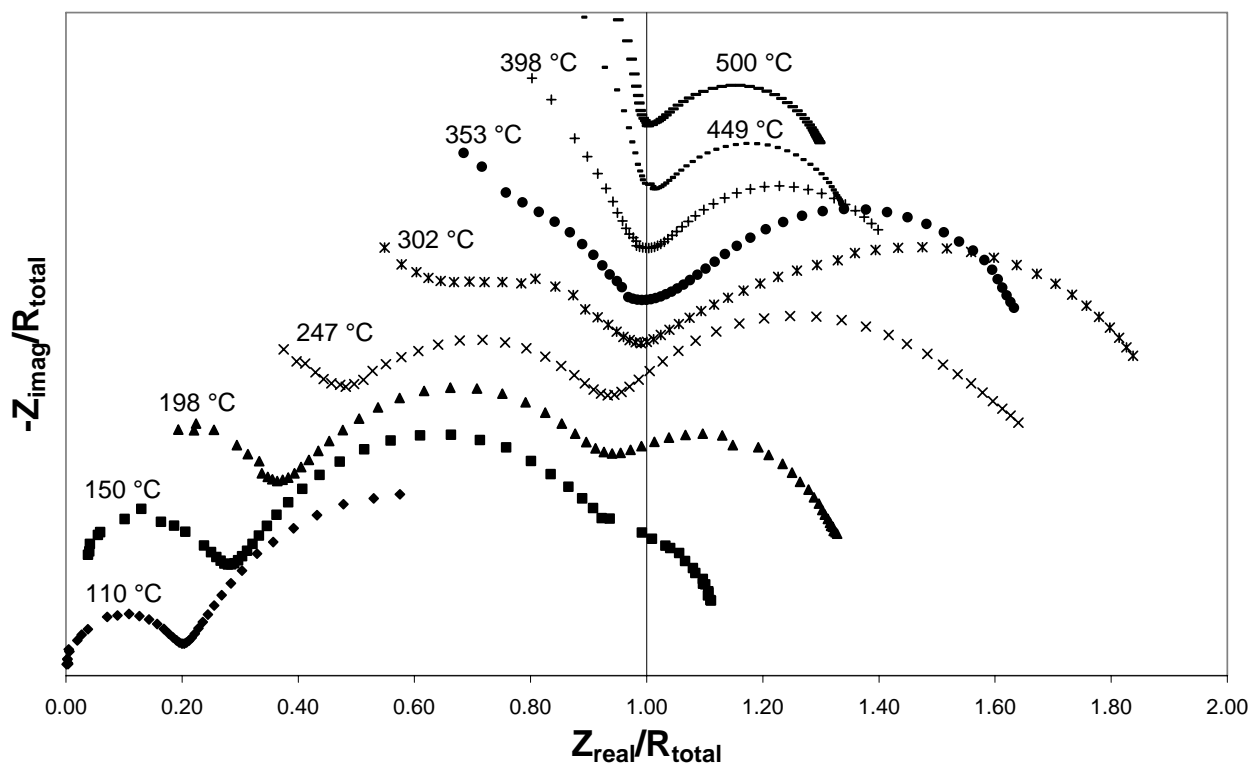

Figure S2. BCZ20Y15 impedance spectra normalized for the total resistance (arbitrary units) and recorded from 1 Hz to 1 MHz at different temperatures in humidified 5% $H_2$ /Ar ( $P_{H_2O} = 0.5$  bar). The impedance arc for  $Z_{real}/R_{total} > 1$  is attributed to the electrode.
